# Supplementary material for: miR-10b-5p expression in Huntington’s disease brain relates to age of onset and the extent of striatal involvement
Source: PubMed Central journal article supplement (PMC4349621; doi:10.1186/s12920-015-0083-3), 2015-03-01
Supplement: 12920_2015_83_MOESM7_ESM.pdf [file 12920_2015_83_MOESM7_ESM.pdf]

**A**

Onset age

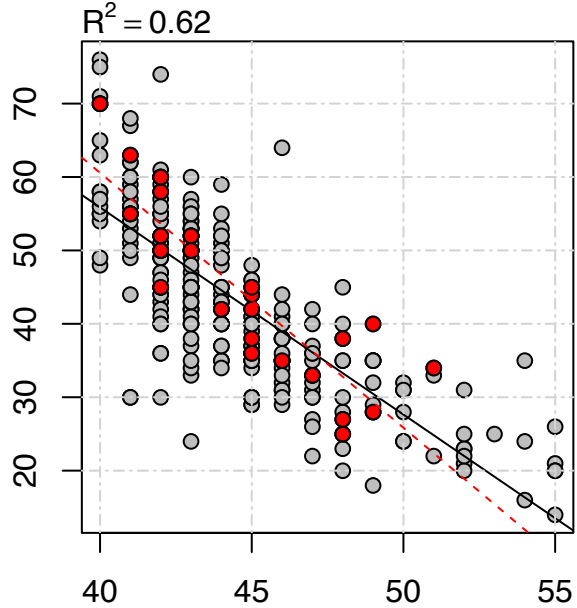

CAG repeat size

**B**

Striatal score

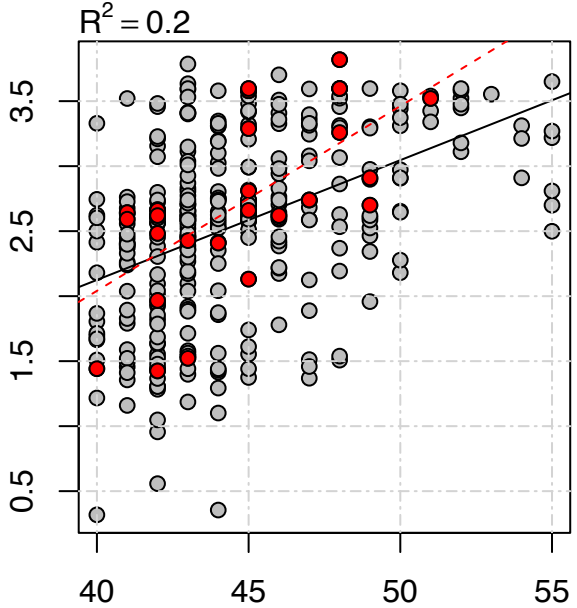

CAG repeat size

**C**

Death age

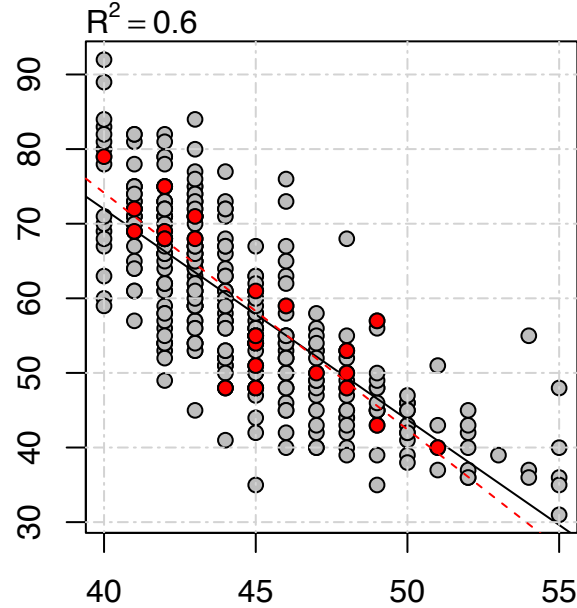

CAG repeat size

**D**

Cortical score

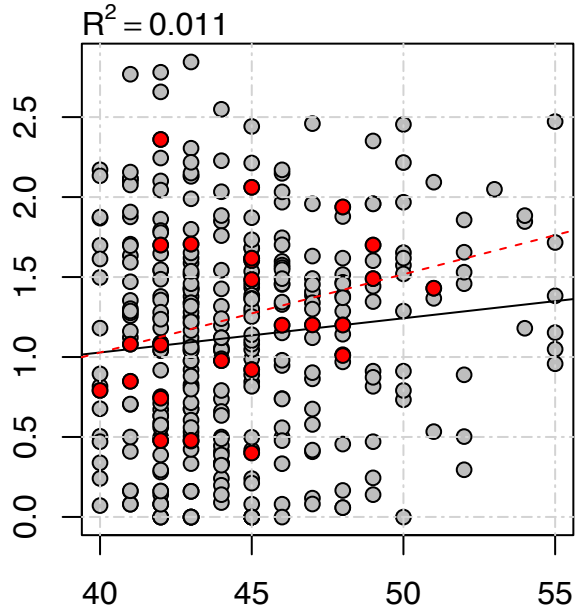

CAG repeat size

**E**

Disease duration

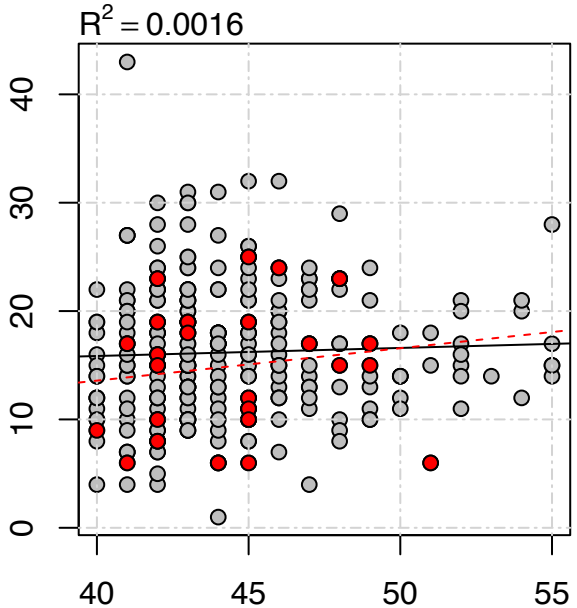

CAG repeat size
